# Supplementary material for: Lysophosphatidic Acid Mediates Imiquimod-Induced Psoriasis-like Symptoms by Promoting Keratinocyte Proliferation through LPAR1/ROCK2/PI3K/AKT Signaling Pathway
Source: MDPI journal article supplement (doi:10.3390/ijms221910777), 2021-10-05
Supplement: s1 [file s1]

Supplementary Table S1: Primer sequences for qRT-PCR

| Gene symbol    | Species | Forward primer           | Reverse primer           |
|----------------|---------|--------------------------|--------------------------|
| Cyclophilin    | Human   | TGCCATCGCCAAGGAGTAG      | TGCACAGACGGTCACTCAAA     |
| LPAR1          | Human   | GCAATCGAGAGGCACATTACG    | CGGTTGCTCATCCGTGTGT      |
| LPAR2          | Human   | TGCTACTACAACGAGACCATC    | CACCACGACCACATCCTT       |
| LPAR3          | Human   | GGTCCATAGCAACCTGACCAA    | ATGGCCCAGACAAGCAAAAT     |
| Cyclophilin    | Mouse   | TGGAGAGCACCAAGACAGACA    | TGCCGGAGTCGACAATGAT      |
| TNF- $\alpha$  | Mouse   | CCAACGGCATGGATCTCAAAGACA | AGATAGCAAATCGGCTGACGGTGT |
| IL-6           | Mouse   | TCCAGTTGCCTTCTTGGGACTGAT | AGCCTCCGACTTGTCAAGTGGTAT |
| IL-17          | Mouse   | GTGTCAATGCGGAGGGAA       | TTCAGGACCAGGATCTCTTGCT   |
| IL-36 $\gamma$ | Mouse   | CAGGCCCTTGTGACAGTTCCA    | TCCTGTTCAAGAGACTCTGGGT   |
